# Supplementary material
Source: PubMed Central journal article supplement (PMC4878938)

**Supplemental Figure 2**  
**Cumulative Incidence of Treatment Discontinuation**  
**Sunitinib**

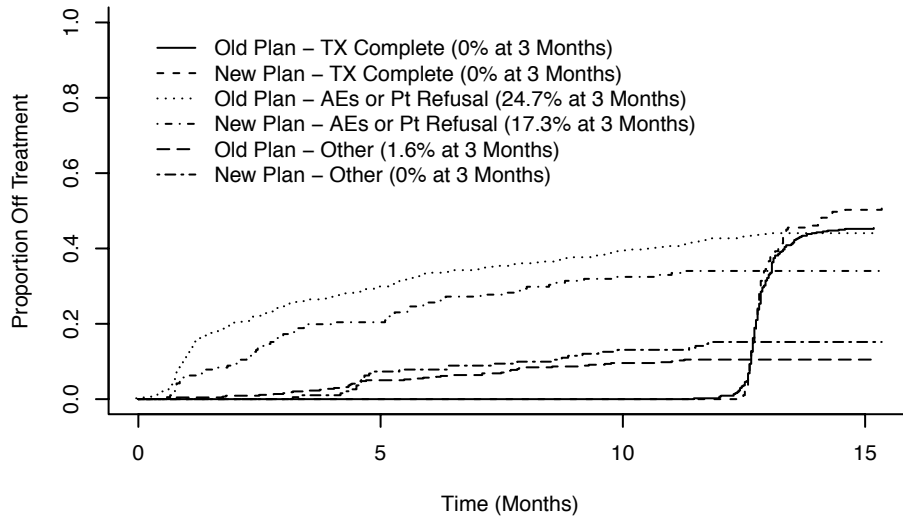

**Sorafenib**

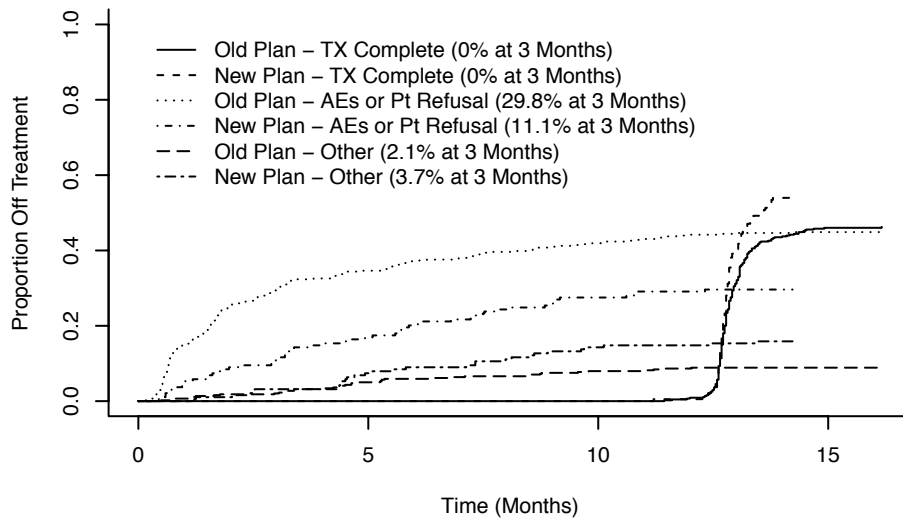

**Placebo**

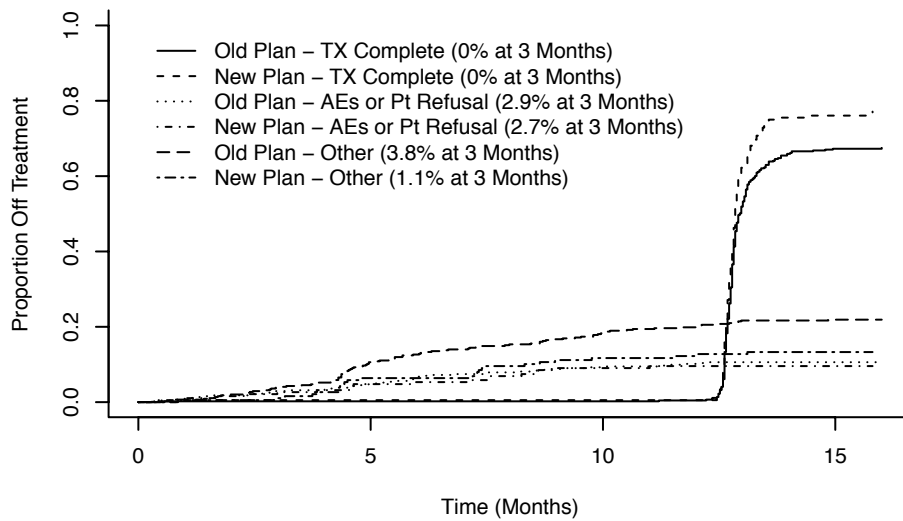

Supplement: NIHMS778628-supplement-2.pdf [file NIHMS778628-supplement-2.pdf]
