# Supplementary material
Source: PubMed Central journal article supplement (PMC4878938)
Supplement: NIHMS778628-supplement-3.pdf [file NIHMS778628-supplement-3.pdf]

**Supplemental Figure 4:  
Landmark Analysis of DFS by Treatment Duration**

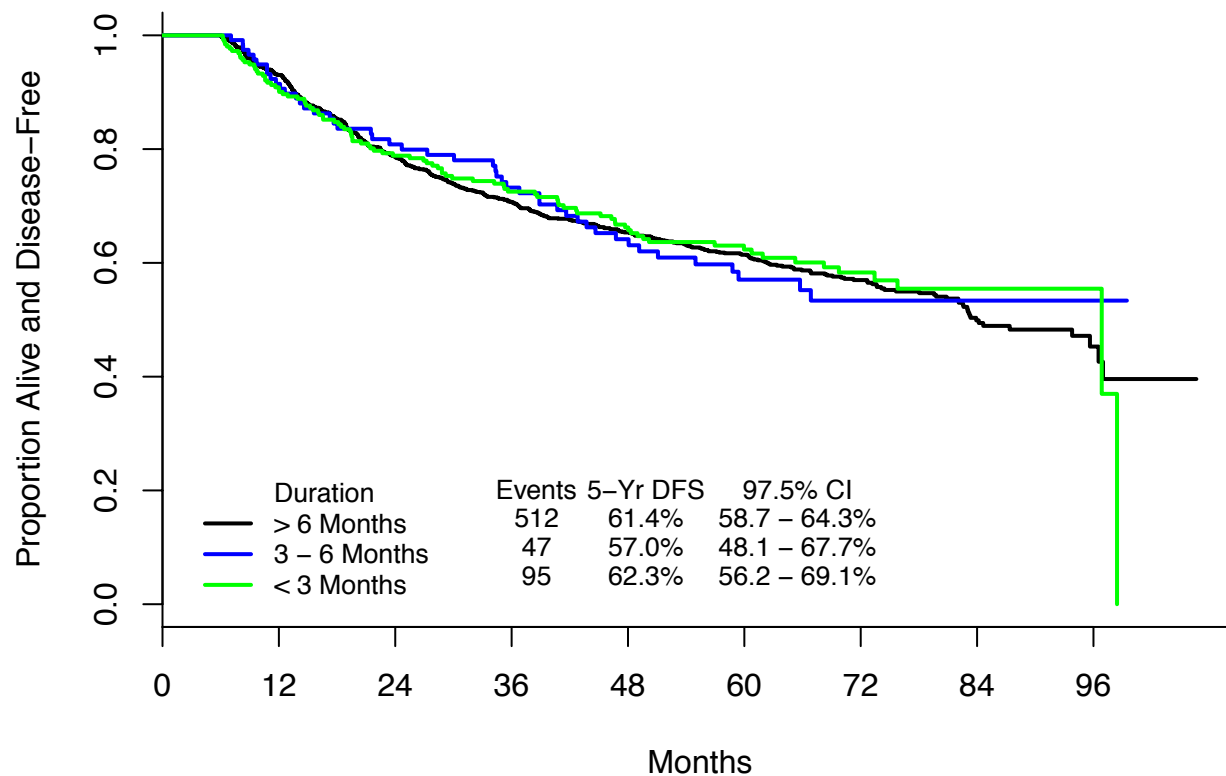

| No. at Risk  | 0    | 12   | 24  | 36  | 48  | 60  | 72  | 84  | 96 |
|--------------|------|------|-----|-----|-----|-----|-----|-----|----|
| > 6 Months   | 1270 | 1166 | 951 | 815 | 691 | 461 | 254 | 111 | 20 |
| 3 – 6 Months | 121  | 107  | 88  | 74  | 60  | 39  | 20  | 9   | 2  |
| < 3 Months   | 255  | 225  | 182 | 156 | 132 | 89  | 49  | 17  | 3  |
